# Supplementary material for: Human Huntington’s disease pluripotent stem cell-derived microglia develop normally but are abnormally hyper-reactive and release elevated levels of reactive oxygen species
Source: PubMed Central journal article supplement (PMC8054367; doi:10.1186/s12974-021-02147-6), 2021-04-19
Supplement: 12974_2021_2147_MOESM1_ESM.pdf [file 12974_2021_2147_MOESM1_ESM.pdf]

**Additional file 1****Supplementary Table 1**

Pluripotent stem cells used in the study

| <b>PSC line</b> | <b>PSC series</b> | <b>Type</b> | <b>HTT polyQ-length</b> | <b>Origin</b>                                                                                                       |
|-----------------|-------------------|-------------|-------------------------|---------------------------------------------------------------------------------------------------------------------|
| 30 <sup>Q</sup> | IsoHD             | ESC         | 30/19                   | Courtesy of M. Pouladi, Agency for Science, Technology and Research and National University of Singapore, Singapore |
| 45 <sup>Q</sup> |                   |             | 45/19                   |                                                                                                                     |
| 81 <sup>Q</sup> |                   |             | 81/19                   |                                                                                                                     |
| QS1             | HD family         | iPSC        | 58/22                   | UCL Queen Square Institute of Neurology                                                                             |
| QS2             |                   |             | 20/22                   |                                                                                                                     |
| QS3             |                   |             | 69/22                   |                                                                                                                     |
| QS4             |                   |             | 75/22                   |                                                                                                                     |
| QS5             | -                 | iPSC        | 125/22                  | UCL Queen Square Institute of Neurology                                                                             |
| 15 <sup>Q</sup> | -                 | iPSC        | 15/15                   | Courtesy of H. Houlden, UCL Queen Square Institute of Neurology                                                     |

**Supplementary Table 2**

Oligonucleotide primers used for qPCR

| <b>Gene target</b> | <b>Forward primer sequence</b> | <b>Reverse primer sequence</b> |
|--------------------|--------------------------------|--------------------------------|
| <i>CIQA</i>        | GTGACACATGCTCTAAGAAG           | GACTCTTAAGCACTGGATTG           |
| <i>GAS6</i>        | CGAAGAACTCAAGAAGCAG            | AGACCTTGATCTCCATTAGG           |
| <i>GPR34</i>       | GAAGACAATGAGAAGTCATACC         | TGTTGCTGAGAAGTTTTGTG           |
| <i>PROS1</i>       | AAAGATGTGGATGAATGCTC           | TCACATTCAAAATCTCCTGG           |
| <i>MERTK</i>       | AGGACTTCCTCACTTTACTAAG         | TGAACCCAGAAAATGTTGAC           |
| <i>P2RY12</i>      | AAGAGCACTCAAGACTTTAC           | GGGTTTGAATGTATCCAGTAAG         |
| <i>TMEM119</i>     | AGTCCTGTACGCCAAGGAAC           | GCAGCAACAGAAGGATGAGG           |
| <i>TREM2</i>       | TCTGAGAGCTTCGAGGATGC           | GGGGATTCTCCTTCAAGA             |
| <i>CD93</i>        | CAGAATGCGGCAGACAGTTA           | TTCAGCAGTCTGTCCCAGGT           |
| <i>CX3CR1</i>      | GGCAGACTTGGATTTTCAGGA          | GGGAACTGATCCATGGTGAA           |
| <i>CD14</i>        | ATTTGGTGGCAGGAGATCAA           | GGCTTCCAGGCTTCACACT            |
| <i>HTT</i>         | AGTGATTGTTGCTATGGAGCGG         | GCTGCTGGTTGGACAGAACTC          |
| <i>GAPDH</i>       | AACAGCGACACCCACTCCT            | CATACCAGGAAATGAGCTTGACAA       |
| <i>ACTB</i>        | AAGGCCAACCGTGAAAAGAT           | GTGGTACGACCAGAGGCATAC          |

|               |                          |                         |
|---------------|--------------------------|-------------------------|
| <i>NANOG</i>  | AACTCTCCAACATCCTGAACCT   | GGCATCCCTGCGTCACA       |
| <i>POU5F1</i> | CTTCAGGAGATATGCAAAGCAGAA | CTGGGCGATGTGGCTGAT      |
| <i>SOX2</i>   | GAAATGGGAGGGGTGCAAAA     | TACCGGGTTTTCTCCATGCT    |
| <i>ZFP42</i>  | CTCCCTTGGGAATTCAGACCTA   | TCCAGCCTCAGTACATTTGTTTC |

**Supplementary Table 3**

Antibodies used for immunofluorescence measures.

| <b>Antibody</b>                          | <b>Species</b>    | <b>Dilution</b> | <b>Supplier</b>           |
|------------------------------------------|-------------------|-----------------|---------------------------|
| Anti-IF1/IBA1 (cat. NB100-1028)          | Goat polyclonal   | 1:500           | Novus Biologicals         |
| Anti-PU.1 (cat. 2266)                    | Rabbit polyclonal | 1:100           | Cell Signaling Technology |
| Anti-TREM2 (cat. AF1828)                 | Goat polyclonal   | 1:50            | R&D Systems               |
| Anti-TMEM119 (cat. HPA052650)            | Rabbit polyclonal | 1:200           | Atlas Antibodies          |
| Anti-CTIP2 (25B6)                        | Rat monoclonal    | 1:300           | Abcam                     |
| Anti-cleaved caspase 3 (5A1E)            | Rabbit monoclonal | 1:400           | Cell Signaling Technology |
| Anti-DARPP32 (H-62)                      | Rabbit polyclonal | 1:200           | Santa Cruz Biotechnology  |
| Anti- $\beta$ III-tubulin (cat. ab18207) | Rabbit polyclonal | 1:500           | Abcam                     |
| Anti-nestin (10C2)                       | Mouse monoclonal  | 1:600           | Merck Millipore           |
| Anti-gamma H2A.X (cat. ab11174)          | Rabbit polyclonal | 1:200           | Abcam                     |

| <b>Antibody</b>                   | <b>Supplier</b>          |
|-----------------------------------|--------------------------|
| Goat anti-rat AlexaFluor 488      | Thermo Fisher Scientific |
| Goat anti-rabbit AlexaFluor 488   | Thermo Fisher Scientific |
| Goat ant-mouse AlexaFluor 568     | Thermo Fisher Scientific |
| Goat anti-chicken AlexaFluor 647  | Thermo Fisher Scientific |
| Donkey anti-goat AlexaFluor 488   | Thermo Fisher Scientific |
| Donkey anti rabbit AlexaFluor 568 | Thermo Fisher Scientific |

**Supplementary Table 4**

Perkin Elmer Columbus software parameters used for the unbiased analysis of each immunofluorescence imaging metric in the study.

| <b>Cell feature</b>          | <b>Columbus building block</b>  | <b>Specifics</b>                                                   | <b>Method</b>                                                                                                                                                                                                                           | <b>Output name</b>                                                   |
|------------------------------|---------------------------------|--------------------------------------------------------------------|-----------------------------------------------------------------------------------------------------------------------------------------------------------------------------------------------------------------------------------------|----------------------------------------------------------------------|
| <b>Nuclei</b>                | Find Nuclei                     | Channel: HOECHST<br>33342<br>Region: None                          | Method: M<br>Diameter: 15 $\mu$ m<br>Splitting coefficient: 0.4<br>Common threshold: 0.1                                                                                                                                                | Population:<br>Nuclei                                                |
|                              | Calculate Intensity Properties  | Channel: HOECHST<br>33342<br>Population: Nuclei<br>Region: Nucleus | Method: Standard, mean                                                                                                                                                                                                                  | Properties:<br>Intensity<br>nuclear<br>HOECHST<br>33342              |
|                              | Calculate Morphology Properties | Population: Nuclei<br>Region: Nucleus                              | Method: Standard, area,<br>roundness                                                                                                                                                                                                    | Properties:<br>Nucleus<br>morphology                                 |
|                              | Select Population               | Population: Nuclei                                                 | Method: Filter by property<br>Nucleus area [ $\mu$ m <sup>2</sup> ]: $\geq$ 40<br>Intensity nucleus HOECHST<br>33342 mean: $\leq$ 18512<br>Nucleus area [ $\mu$ m <sup>2</sup> ]: $\leq$ 200<br>Boolean operations: F1 and F2<br>and F3 | Population:<br>Viable nuclei                                         |
| <b>Caspase 3 +ve neurons</b> | Find Cytoplasm                  | Channel: Alexa 488<br>Nuclei: Nuclei                               | Method: B<br>Common threshold: 0.45<br>Individual threshold: 0.15                                                                                                                                                                       |                                                                      |
|                              | Calculate Intensity Properties  | Channel: Alexa 488<br>Population: Nuclei<br>Region: Cytoplasm      | Method: Standard, mean                                                                                                                                                                                                                  | Properties:<br>Caspase 3<br>cytoplasmic<br>intensity in<br>all cells |

|                                |                                |                                                                      |                                                                                                                                       |                                                                  |
|--------------------------------|--------------------------------|----------------------------------------------------------------------|---------------------------------------------------------------------------------------------------------------------------------------|------------------------------------------------------------------|
|                                | Select Population              | Population: Nuclei                                                   | Method: Filter by property<br>Intensity cytoplasmic caspase 3 in all cells, mean: $\geq 1000$                                         | Population:<br>Cells with cytoplasmic caspase 3 over a threshold |
| <b>Caspase 3 +ve microglia</b> | Find Cytoplasm                 | Channel: Alexa 488<br>Nuclei: Nuclei                                 | Method: B<br>Common threshold: 0.45<br>Individual threshold: 0.15                                                                     |                                                                  |
|                                | Calculate Intensity Properties | Channel: Alexa 568<br>Population: Nuclei<br>Region: Cytoplasm        | Method: Standard, mean                                                                                                                | Properties:<br>Caspase 3 cytoplasmic intensity in all cells      |
|                                | Select Population              | Population: Nuclei                                                   | Method: Filter by Property<br>Caspase 3 cytoplasmic intensity in all cells<br>Mean: $\geq 335$                                        | Population:<br>Cells with Caspase 3 over a threshold             |
| <b>Nestin+ cells</b>           | Find Cells                     | Channel: Alexa 568<br>ROI: Viable nuclei<br>ROI Region : Cell        | Method: B<br>Common threshold: 0.4<br>Area: $> 70 \mu\text{m}^2$<br>Split factor: 7<br>Individual threshold: 0.5<br>Contrast: $> 0.3$ | Population:<br>Nestin+ cells                                     |
|                                | Find Cytoplasm                 | Channel: Alexa 568<br>Nuclei: Viable nuclei                          | Method: B<br>Common threshold: 0.45<br>Individual threshold: 0.15                                                                     |                                                                  |
|                                | Calculate Intensity Properties | Channel: Alexa 568<br>Population: Viable nuclei<br>Region: Cytoplasm | Method: Standard, mean                                                                                                                | Properties:<br>Intensity cytoplasm Alexa 568                     |

|                                                   |                                |                                                                      |                                                                                                                                       |                                                                                         |
|---------------------------------------------------|--------------------------------|----------------------------------------------------------------------|---------------------------------------------------------------------------------------------------------------------------------------|-----------------------------------------------------------------------------------------|
|                                                   | Select Population              | Population : Viable nuclei                                           | Method: Filter by Property<br>Intensity cytoplasm Alexa 568,<br>mean: $\geq 1500$                                                     | Population:<br>Viable nuclei<br>with<br>cytoplasmic<br>Nestin over a<br>threshold       |
| <b><math>\beta</math>III-tubulin+<br/>neurons</b> | Find Cytoplasm                 | Channel: Alexa 647<br>Nuclei: Viable nuclei                          | Method: B<br>Common threshold: 0.45<br>Individual threshold: 0.15                                                                     |                                                                                         |
|                                                   | Calculate Intensity Properties | Channel: Alexa 647<br>Population: Viable nuclei<br>Region: Cytoplasm | Method: Standard, mean                                                                                                                | Properties:<br>Intensity<br>cytoplasm<br>Alexa 647                                      |
|                                                   | Select Population              | Population: Viable nuclei                                            | Method: Filter by Property<br>Intensity cytoplasm Alexa 647,<br>mean: $\geq 1200$                                                     | Population:<br>Viable nuclei<br>with<br>cytoplasmic<br>B3tubulin<br>over a<br>threshold |
| <b>CTIP2+<br/>neurons</b>                         | Calculate Intensity Properties | Channel: Alexa 568<br>Population: Viable nuclei<br>Region: Nucleus   | Method: Standard, mean                                                                                                                | Properties :<br>Intensity<br>nucleus<br>Alexa 568                                       |
|                                                   | Select Population              | Population: Viable nuclei                                            | Method: Filter by property<br>Intensity nucleus Alexa 568<br>mean: $\geq 500$                                                         | Population:<br>CTIP+ cells                                                              |
| <b>DARPP32+<br/>neurons</b>                       | Find Cells                     | Channel: Alexa 488<br>Region: None                                   | Method: B<br>Common threshold: 0.4<br>Area: $> 70 \mu\text{m}^2$<br>Split Factor: 7<br>Individual threshold: 0.5<br>Contrast: $> 0.3$ | Population:<br>DARPP32+<br>cells (Find<br>Cells)                                        |
|                                                   | Calculate Intensity Properties | Channel: Alexa 488<br>Population:<br>DARPP32+ cells<br>(Find Cells)  | Method: Standard, mean                                                                                                                | Properties:<br>Intensity of<br>DARPP32+<br>cells                                        |

|  |                                 |                                                                                          |                                                                                                                                            |                                                                                        |
|--|---------------------------------|------------------------------------------------------------------------------------------|--------------------------------------------------------------------------------------------------------------------------------------------|----------------------------------------------------------------------------------------|
|  |                                 | Region: Cell                                                                             |                                                                                                                                            |                                                                                        |
|  | Find Image Region               | Channel: Alexa 488<br>Region: None                                                       | Method : Common threshold<br>Threshold: 0.5<br>Area: > 10 $\mu\text{m}^2$                                                                  | Population:<br>DARPP32+<br>area<br>Region:<br>DARPP32+<br>total staining               |
|  | Calculate Morphology Properties | Population:<br>DARPP32+ area<br>Region: DARPP32+<br>total staining                       | Method: Standard, area,<br>roundness                                                                                                       | Properties:<br>DARPP32+<br>total staining                                              |
|  | Calculate Intensity Properties  | Channel: Alexa 488<br>Population:<br>DARPP32+ area<br>Region: DARPP32+<br>total staining | Method: Standard, sum                                                                                                                      | Properties:<br>Intensity<br>DARPP32+<br>total staining                                 |
|  | Find Cytoplasm                  | Channel: Alexa 488<br>Nuclei: Viable nuclei                                              | Method: B<br>Common threshold: 0.45<br>Individual threshold: 0.15                                                                          |                                                                                        |
|  | Calculate Intensity Properties  | Channel: Alexa 488<br>Population: Viable<br>nuclei<br>Region: Cell (2)                   | Method: Standard, mean                                                                                                                     | Properties:<br>Intensity Cell<br>Alexa 488                                             |
|  | Select Population               | Population: Viable<br>nuclei                                                             | Method: Filter by Property<br>Intensity Cell Alexa 488<br>Mean: $\geq 1200$                                                                | Population:<br>Viable nuclei<br>with<br>cytoplasmic<br>DARPP32+<br>over a<br>threshold |
|  | Find Spots                      | Channel: Alexa 488<br>Region: Viable<br>nuclei                                           | Method: C<br>Radius: < 5px<br>Contrast: > 0.1<br>Uncorrected Spot to Region<br>Intensity: > 1<br>Distance: > 3px<br>Spot Peak Radius: 0 px | Population:<br>H2AX+<br>spots in<br>viable nuclei                                      |



|                       |                                |                                                                      |                                                                               |                                                                     |
|-----------------------|--------------------------------|----------------------------------------------------------------------|-------------------------------------------------------------------------------|---------------------------------------------------------------------|
| <b>H2AX+ spots</b>    |                                |                                                                      | Calculate Spot Properties                                                     |                                                                     |
|                       | Select Population              | Population: Viable nuclei                                            | Method: Filter by property<br>Number of spots: > 4                            | Population:<br>Viable nuclei with >4 H2AX+ spots                    |
|                       | Select Population              | Population: Viable nuclei                                            | Method: Filter by property<br>Number of Spots: > 10                           | Population:<br>Viable nuclei with >10 H2AX+ spots                   |
| <b>TMEM119+ cells</b> | Calculate Intensity Properties | Channel: Alexa 568<br>Population: Viable nuclei<br>Region: Nucleus   | Method: Standard, mean                                                        | Properties:<br>Intensity Nucleus Alexa 568                          |
|                       | Select Population              | Population: Viable nuclei                                            | Method: Filter by property<br>Intensity Nucleus Alexa 568<br>Mean: >= 380     | Population:<br>Tmem119+ viable cells (nuclear stain)                |
| <b>IBA+ cells</b>     | Find Cytoplasm                 | Channel: Alexa 488<br>Nuclei: Viable Nuclei                          | Method: B<br>Common Threshold: 0.45<br>Individual Threshold: 0.15             |                                                                     |
|                       | Calculate Intensity Properties | Channel: Alexa 488<br>Population: Viable Nuclei<br>Region: Cytoplasm | Method: Standard, mean                                                        | Properties:<br>Intensity Cytoplasm Alexa 488                        |
|                       | Select Population              | Population: Viable Nuclei                                            | Method: Filter by Property<br>Intensity Cytoplasmic Alexa 488<br>Mean: >= 300 | Population:<br>Viable nuclei with cytoplasmic IBA1 over a threshold |

|                     |                                |                                                                       |                                                                                 |                                                                    |
|---------------------|--------------------------------|-----------------------------------------------------------------------|---------------------------------------------------------------------------------|--------------------------------------------------------------------|
| <b>PU.1+ cells</b>  | Calculate Intensity Properties | Channel: Alexa 568<br>Population: Viable Nuclei<br>Region: Nucleus    | Method: Standard, mean                                                          | Properties:<br>Intensity Nucleus<br>Alexa 568                      |
|                     | Select Population              | Population: Viable Nuclei                                             | Method: Filter by Property<br>Intensity Nucleus Alexa 568<br>Mean: $\geq 380$   | Population: PU1+ viable nuclei                                     |
| <b>TREM2+ cells</b> | Find Cytoplasm                 | Channel: Alexa 488<br>Nuclei: Viable nuclei                           | Method: B<br>Common Threshold: 0.45<br>Individual Threshold: 0.15               |                                                                    |
|                     | Calculate Intensity Properties | Channel: Alexa 488,<br>Population: Viable Nuclei<br>Region: Cytoplasm | Method: Standard, mean                                                          | Properties:<br>Intensity Cytoplasm<br>Alexa 488                    |
|                     | Select Population              | Population: Viable Nuclei                                             | Method: Filter by Property<br>Intensity Cytoplasm Alexa 488<br>Mean: $\geq 200$ | Population: Viable nuclei with cytoplasmic Trem2+ over a threshold |
